# Supplementary material for: The HopQ-CEACAM Interaction Controls CagA Translocation, Phosphorylation, and Phagocytosis of Helicobacter pylori in Neutrophils
Source: PubMed Central journal article supplement (PMC7002351; doi:10.1128/mbio.03256-19), 2020-02-04
Supplement: mBio.03256-19-sf006.pdf [file mBio.03256-19-sf006.pdf]

**A** CEACAM<sub>all</sub> PMNs

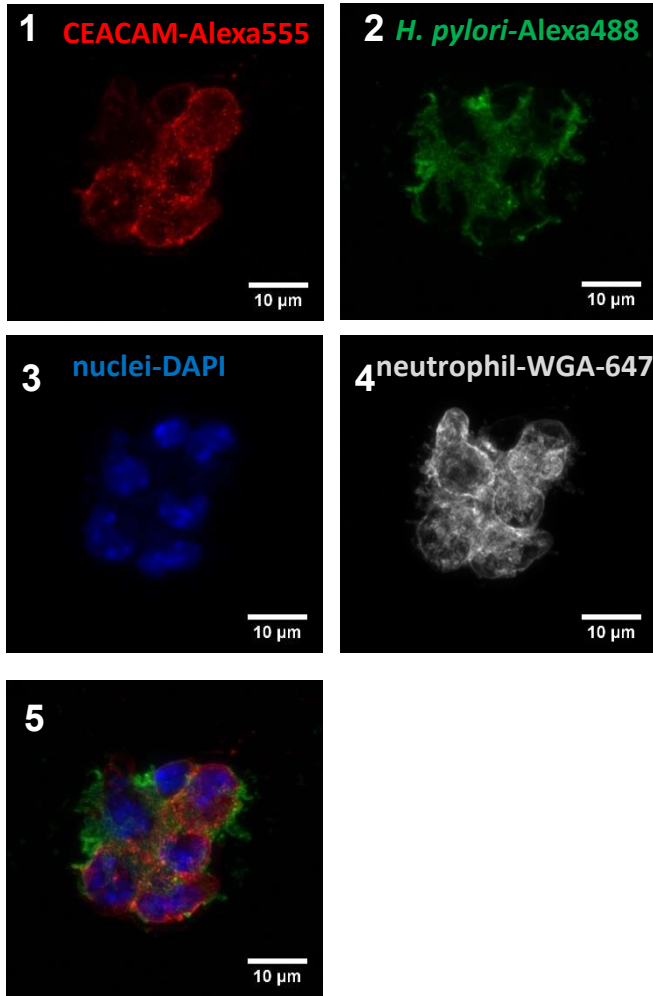

**B** murine PMNs

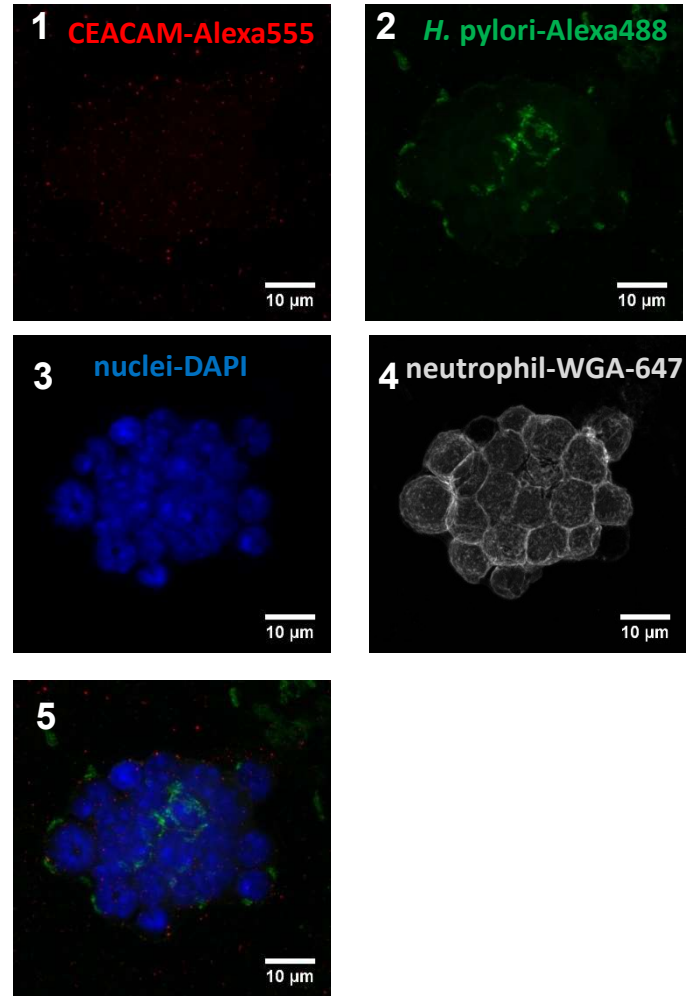

|                                  |                            |      |     |
|----------------------------------|----------------------------|------|-----|
| hCEACAM <sub>all</sub> -Alexa555 | <i>H. pylori</i> -Alexa488 | DAPI | WGA |
|----------------------------------|----------------------------|------|-----|
