# Supplementary material for: The HopQ-CEACAM Interaction Controls CagA Translocation, Phosphorylation, and Phagocytosis of Helicobacter pylori in Neutrophils
Source: PubMed Central journal article supplement (PMC7002351; doi:10.1128/mbio.03256-19), 2020-02-04

Binding (cytochalasin D control)

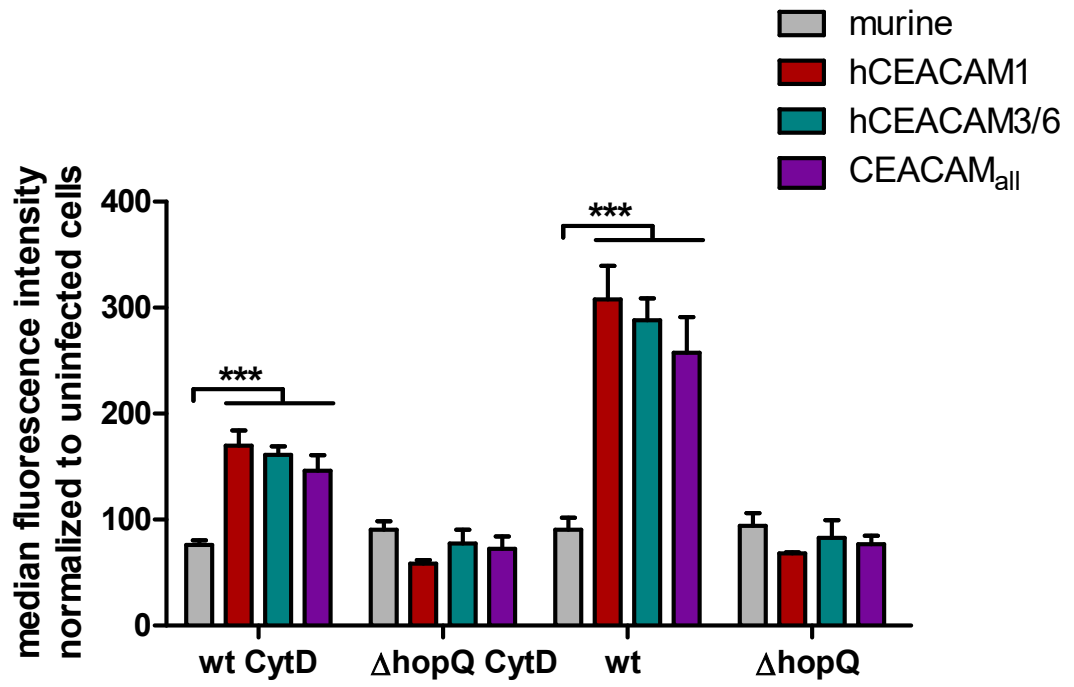

Supplement: mBio.03256-19-sf007.pdf [file mBio.03256-19-sf007.pdf]
